# Supplementary material for: Cost-Constrained feature selection in binary classification: adaptations for greedy forward selection and genetic algorithms
Source: Springer Nature journal article supplement (doi:10.1186/s12859-020-3361-9), 2020-01-28
Supplement: 12859_2020_3361_MOESM2_ESM.pdf [file 12859_2020_3361_MOESM2_ESM.pdf]

**Setting A** $p = 30, p^{(rel)} = 18, \gamma = 1/2, \beta = 0.3$ 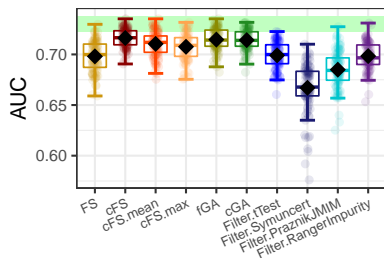**Setting B** $p = 30, p^{(rel)} = 3, \gamma = 2/3, \beta = 1$ 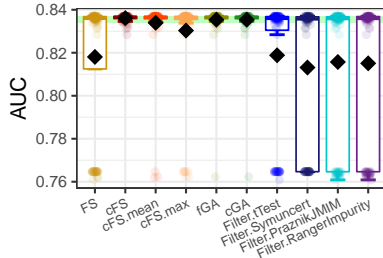**Setting C** $p = 300, p^{(rel)} = 30, \gamma = 1/3, \beta = 0.5$ 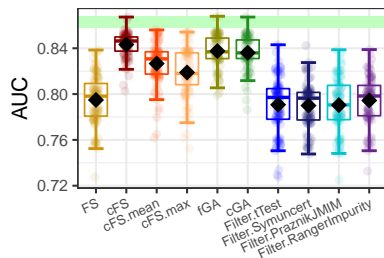**Setting D** $p = 300, p^{(rel)} = 3, \gamma = 2/3, \beta = 0.5$ 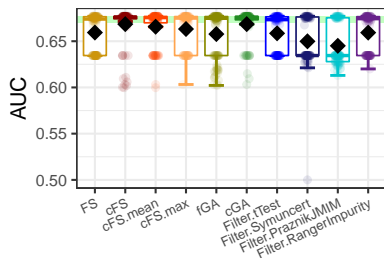**Setting E** $p = 1500, p^{(rel)} = 15, \gamma = 2, \beta = 0.5$ 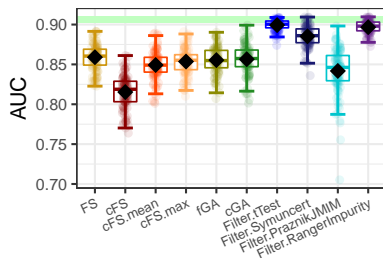**Setting F** $p = 1500, p^{(rel)} = 20, \gamma = 1/2, \beta = 0.5$ 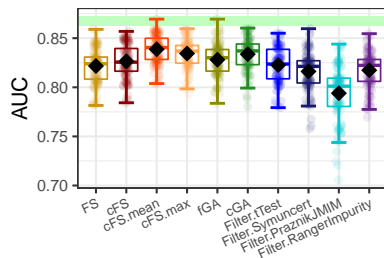**Setting G** $p = 300, p^{(rel)} = 30, \gamma = 1/3, \beta = 0.3, \Sigma \neq I_p$ 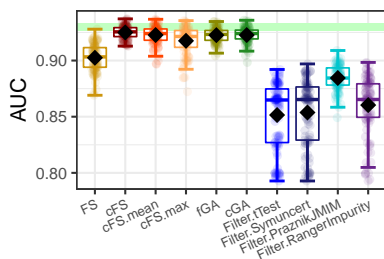**Setting H** $p = 300, p^{(rel)} = 30, \gamma = 1/3, \beta = 0.5, c_1 - \beta_1$ 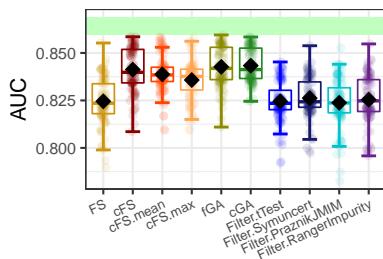**Setting I** $p = 300, p^{(rel)} = 30, \gamma = 1/3, \beta = \{0, 1\}$ 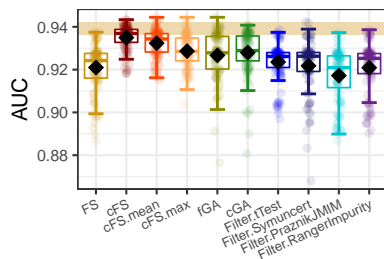**Setting J** $p = 300, p^{(rel)} = 30, \gamma = 1/3, \beta = \{0, 1\}, c_1 - \beta_1$ 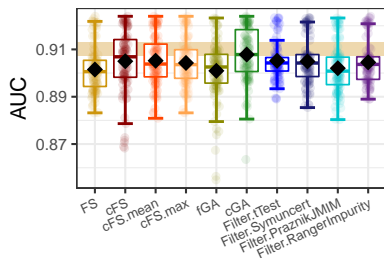**Setting K** $p = 300, p^{(rel)} = 30, \gamma = 1/3, \beta = 0.5, X \text{ not } N(\cdot)$ 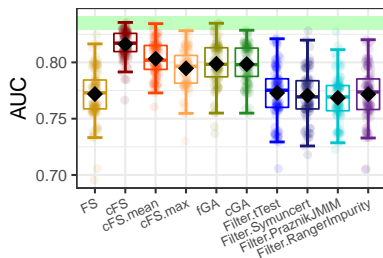

$[q_{0.05}, q_{0.95}]$ -CI of Cost-Optimal Set

$[q_{0.05}, q_{0.95}]$ -CI of Ratio-Optimal Set

Mean AUC

Results on individual data sets
