# Supplementary material for: Cost-Constrained feature selection in binary classification: adaptations for greedy forward selection and genetic algorithms
Source: Springer Nature journal article supplement (doi:10.1186/s12859-020-3361-9), 2020-01-28

## Setting R

$\rho = 298$ ,  $\rho^{(rel)} = 30$ ,  $\gamma = 1/3$ ,  $\beta = 0.5$

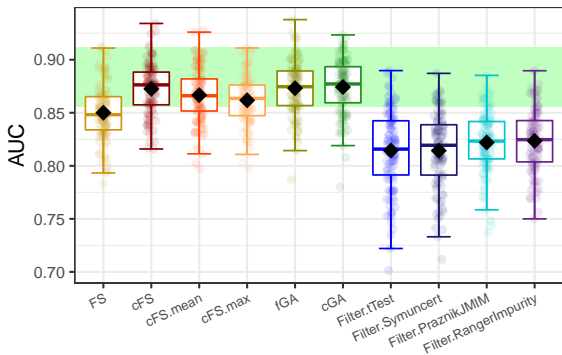

## Setting S

$\rho = 1776$ ,  $c_{max} = 1.5$  (left) |  $c_{max} = 3$  (right)

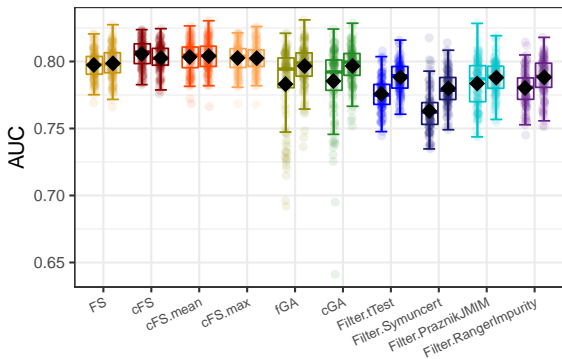

Supplement: 12859_2020_3361_MOESM4_ESM.pdf [file 12859_2020_3361_MOESM4_ESM.pdf]
