# Supplementary material for: Cost-Constrained feature selection in binary classification: adaptations for greedy forward selection and genetic algorithms
Source: Springer Nature journal article supplement (doi:10.1186/s12859-020-3361-9), 2020-01-28

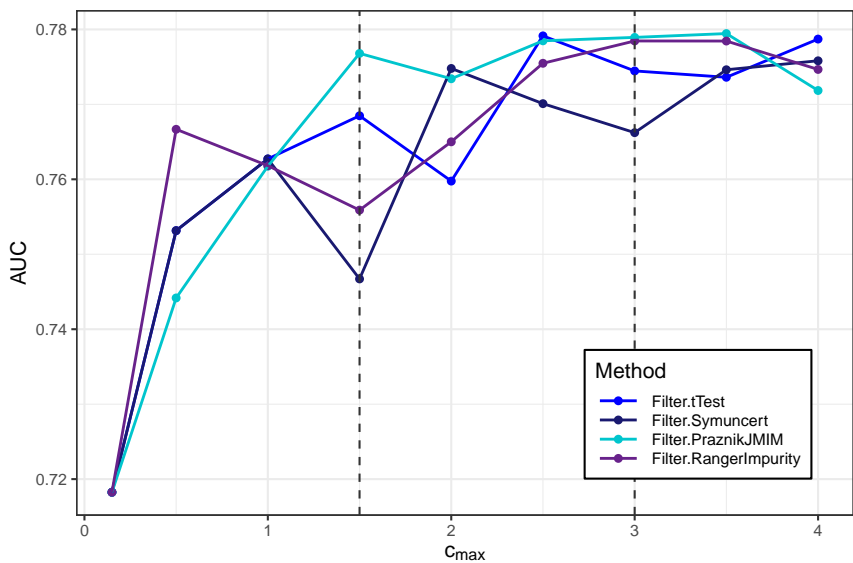

Supplement: 12859_2020_3361_MOESM6_ESM.pdf [file 12859_2020_3361_MOESM6_ESM.pdf]
