# Supplementary material for: Cost-Constrained feature selection in binary classification: adaptations for greedy forward selection and genetic algorithms
Source: Springer Nature journal article supplement (doi:10.1186/s12859-020-3361-9), 2020-01-28

# Setting I

Number of Models the Feature was Selected into

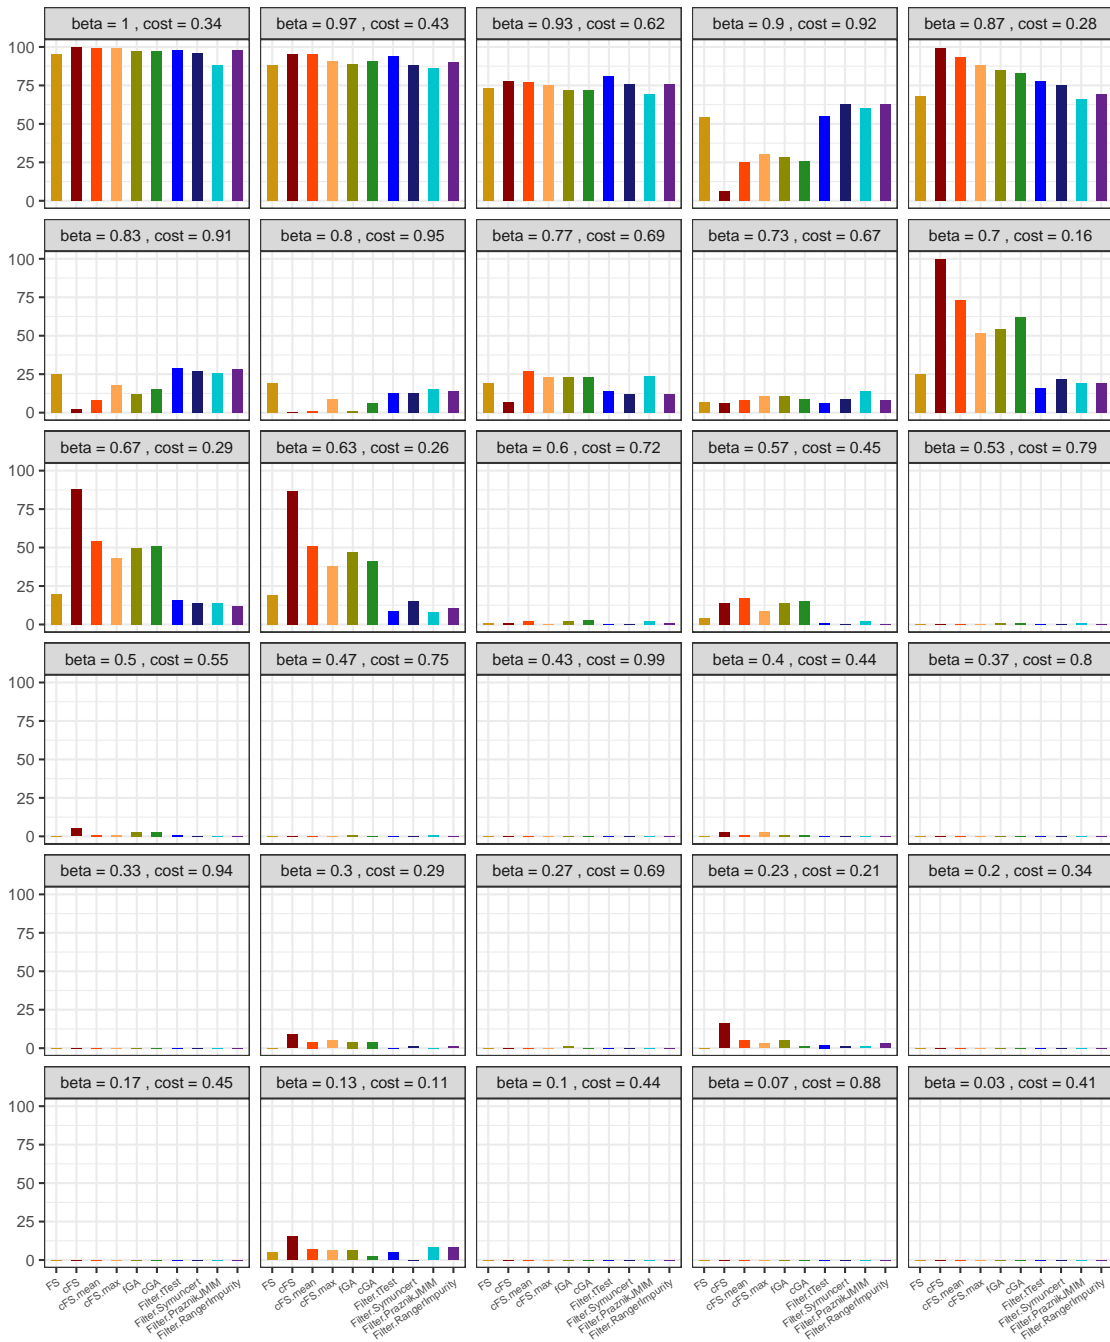

# Setting J

Number of Models the Feature was Selected into

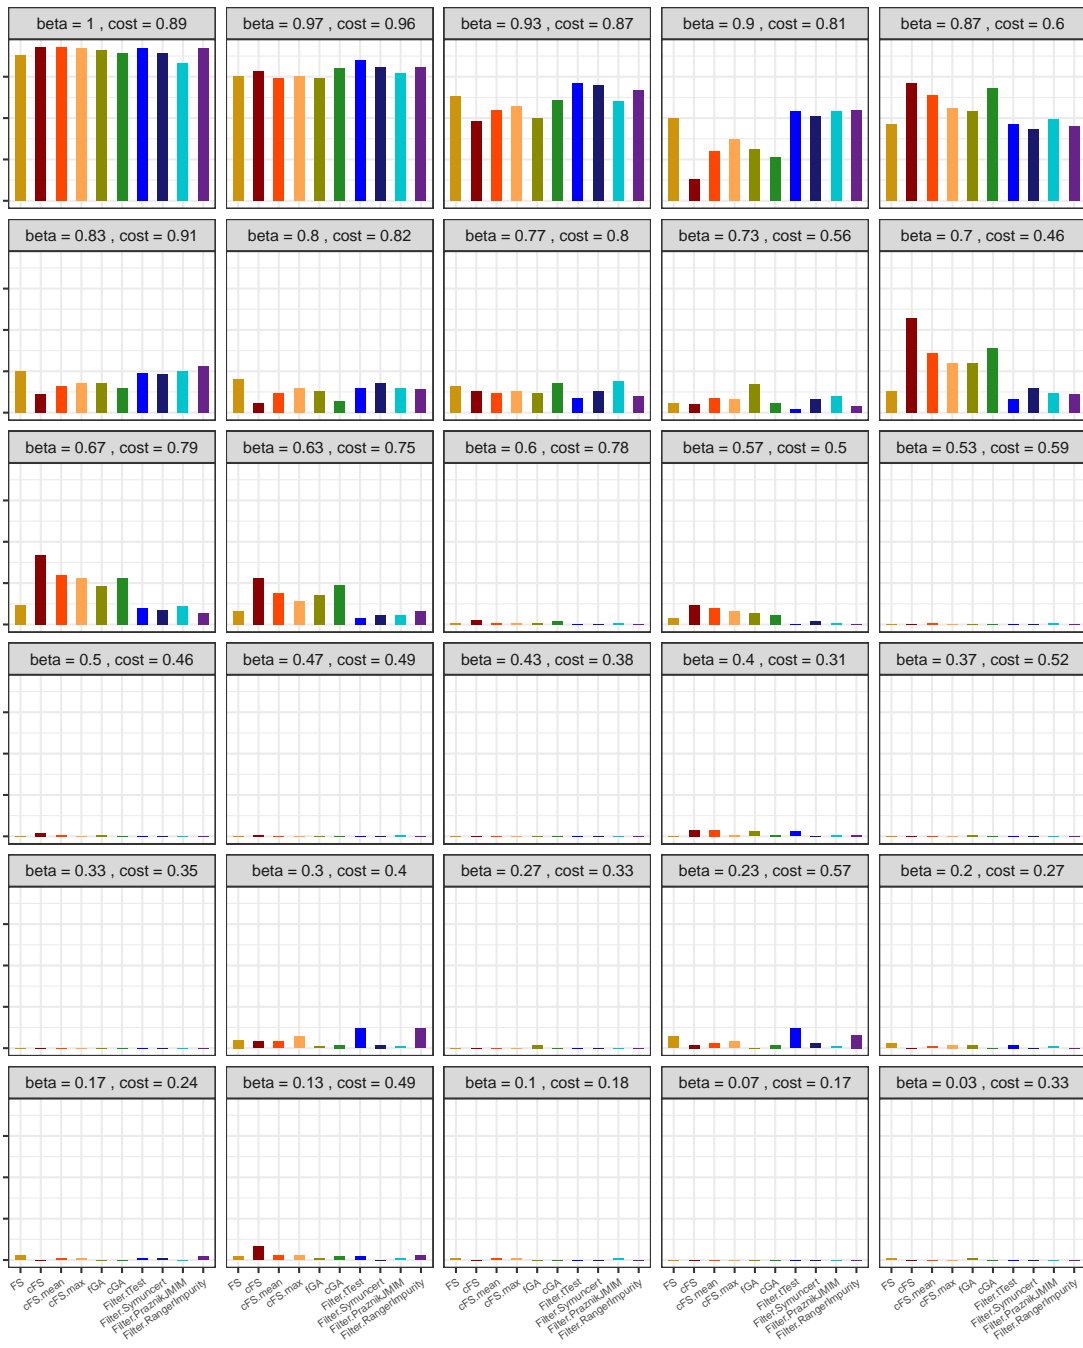

Supplement: 12859_2020_3361_MOESM7_ESM.pdf [file 12859_2020_3361_MOESM7_ESM.pdf]
